# Supplementary material
Source: HighWire-hosted journal article supplement (https://sit.bmj.com/highwire/filestream/539/field_highwire_adjunct_files/0/bmjsit-2022-000156supp001_data_supplement.pdf)
Supplement: bmjsit-2022-000156supp001_data_supplement.pdf [file bmjsit-2022-000156supp001_data_supplement.pdf]

Supplementary Table 1: Cholangiography

| Ref. No. | Author      | Country         | Journal                            | Year | Study design  | Patient selection                                  |                      |                   | Imaging techniques                                                        |                                        |                                                                               |                                            |                          | Endpoint measures                                      |                                                                                                                                                      |                                                                         |                                                       | Learning curve | Cost analysis | Other comments                                                                                                                                                                                                                                 | Ref. detail                                                                                                                          |                                                                                                                                       |
|----------|-------------|-----------------|------------------------------------|------|---------------|----------------------------------------------------|----------------------|-------------------|---------------------------------------------------------------------------|----------------------------------------|-------------------------------------------------------------------------------|--------------------------------------------|--------------------------|--------------------------------------------------------|------------------------------------------------------------------------------------------------------------------------------------------------------|-------------------------------------------------------------------------|-------------------------------------------------------|----------------|---------------|------------------------------------------------------------------------------------------------------------------------------------------------------------------------------------------------------------------------------------------------|--------------------------------------------------------------------------------------------------------------------------------------|---------------------------------------------------------------------------------------------------------------------------------------|
|          |             |                 |                                    |      |               | Subject                                            | N (cases)            | Fluorogenic agent | Dose                                                                      | Route                                  | Timing                                                                        | Imaging system                             | Quantitative measurement | Main endpoints                                         | Imaging accuracy/success rate                                                                                                                        | Clinical impact, changes in intraoperative decision-making and outcomes | Clinical impact, advantages in postoperative outcomes |                |               |                                                                                                                                                                                                                                                |                                                                                                                                      | Adverse effects                                                                                                                       |
| 1        | Mitsuhashi  | Japan           | J Hepatobiliary Pancreat Surg.     | 2008 | Case series   | Open cholecystectomy                               | 5                    | ICG               | 2.5mg                                                                     | IV                                     | Before anaesthesia                                                            | PDE (Hamamatsu)                            | NA                       | Visualization of the biliary anatomy                   | CyD (100%), CHD (100%), CHD (100%), and CyD-CHD junction (c)                                                                                         | NA                                                                      | NA                                                    | None           | NA            | NA                                                                                                                                                                                                                                             | Manuscript combines animal and human studies                                                                                         | Mitsuhashi N, Kimura F, Shimizu H, Inamaki M, Yoshikawa H, Ohnaka M, et al. J Hepatobiliary Pancreat Surg. 2008;16(4):506-14.         |
| 2        | Ishizawa    | Japan           | J Am Coll Surg                     | 2009 | Prospective   | Open cholecystectomy                               | 10 (+13 hepatectomy) | ICG               | 2.5mg                                                                     | IV (biliary injection for hepatectomy) | 1 hour before operation or at the time of conversion                          | PDE (Hamamatsu)                            | NA                       | Visualization of the biliary anatomy                   | CyD (100%), CHD (100%), CHD (100%), and CyD-CHD junction (c) right infrahepatic branch draining into the CHD was visualized by FC at all conversion. | NA                                                                      | NA                                                    | None           | NA            | NA                                                                                                                                                                                                                                             | Right lateral sector branch draining into the CHD was visualized by FC in all 4 patients.                                            | Ishizawa T, Tamura S, Maeda K, Aoki T, Hasegawa K, Inamura H, Bock Y, Kobudo N. J Am Coll Surg. 2009;208(1):e1-4.                     |
| 3        | Ishizawa    | Japan           | Arch Surg                          | 2009 | Case report   | Lap-cholecystectomy                                | 1                    | ICG               | 2.5mg                                                                     | IV                                     | 2 hours before surgery                                                        | Prototype (Shinko optical)                 | NA                       | Feasibility                                            | NA                                                                                                                                                   | NA                                                                      | NA                                                    | None           | NA            | NA                                                                                                                                                                                                                                             | Ishigawa T, Bando Y, Kohkubo N. Arch Surg. 2009;144(4):531-2.                                                                        |                                                                                                                                       |
| 4        | Ishizawa    | Japan           | Br J Surg                          | 2010 | Prospective   | Lap-cholecystectomy                                | 52                   | ICG               | 2.5mg                                                                     | IV                                     | 30 min before the patient entered the operating room or following intubation. | Prototype (Shinko optical)                 | NA                       | Visualization of the biliary anatomy                   | CyD (100% before dissection), CHD (100%), CHD (100%), and CyD-CHD junction (c) (n=100%).                                                             | NA                                                                      | NA                                                    | None           | NA            | NA                                                                                                                                                                                                                                             | Compared with intraoperative drip infusion cholangiography                                                                           | Ishizawa T, Bando Y, Iishi M, Kaneko J, Hasegawa K, Kohkubo N, Bock Y. Surg. 2010;97(9):1369-77.                                      |
| 5        | Tagaya      | Japan           | J Hepatobiliary Pancreat Sci       | 2010 | Prospective   | Open cholecystectomy in 4 Lap-cholecystectomy in 8 | 12                   | ICG               | 2.5mg                                                                     | IV                                     | 1-2 hours before surgery                                                      | Prototype                                  | NA                       | Visualization of the biliary anatomy                   | CyD (100%), CHD (100%), CHD (100%), and CyD-CHD junction (100%)                                                                                      | NA                                                                      | NA                                                    | None           | NA            | NA                                                                                                                                                                                                                                             | Manuscript combines animal and human studies                                                                                         | Tagaya N, Shimoda M, Kato M, Nakagawa A, Abe A, Iwatsuki Y, et al. J Hepatobiliary Pancreat Sci. 2010;17(2):395-400.                  |
| 6        | Aoki        | Japan           | J Hepatobiliary Pancreat Sci       | 2010 | Prospective   | Lap-cholecystectomy                                | 14                   | ICG               | 12.5mg                                                                    | IV                                     | 30 minutes preoperatively                                                     | Prototype (Hamamatsu)                      | NA                       | Visualization of the biliary anatomy                   | CyD (71%), CHD (c), CHD (71%), and CyD-CHD junction (c)                                                                                              | NA                                                                      | NA                                                    | None           | NA            | NA                                                                                                                                                                                                                                             | Aoki T, Murakami M, Yasuda D, Shimizu Y, Kawano T, Matsuda K, et al. J Hepatobiliary Pancreat Sci. 2010;17(5):596-4.                 |                                                                                                                                       |
| 7        | Ishizawa    | Japan           | Surg Endosc                        | 2011 | Prospective   | Single-incision laparoscopic cholecystectomy       | 7                    | ICG               | 2.5mg                                                                     | IV                                     | 35-75 minutes before fluorescence imaging                                     | Prototype (Hamamatsu)                      | NA                       | Visualization of the biliary anatomy                   | CyD (71% before dissection), CHD (100%), CHD (c), and CyD-CHD junction (100%).                                                                       | NA                                                                      | NA                                                    | None           | NA            | NA                                                                                                                                                                                                                                             | Ishizawa T, Kaneko J, Inoue Y, Takemura N, Sryama Y, Aoki T, et al. Surg Endosc. 2011;25(6):201-6.                                   |                                                                                                                                       |
| 8        | Buchs       | Switzerland     | Int J Med Robot                    | 2012 | Prospective   | Robotic single site cholecystectomy                | 12                   | ICG               | 2.5mg                                                                     | IV                                     | 45 minutes before surgery                                                     | da Vinci Si HD                             | NA                       | Visualization of the biliary anatomy                   | CyD (100%), CHD (100%), CHD (100%), and CyD-CHD junction (100%).                                                                                     | NA                                                                      | NA                                                    | None           | NA            | NA                                                                                                                                                                                                                                             | Buchs NC, Hagen ME, Pugin F, Volonté F, Bucher F, Schaller E, et al. MRCAS. 2012;38(4):36-40.                                        |                                                                                                                                       |
| 9        | Kaneko      | Japan           | Surg Laparosc Endosc Percutan Tech | 2012 | Prospective   | Lap-cholecystectomy                                | 28                   | ICG               | 2.5mg for FC (0.05mg/kg was retrospectively intravenously for conversion) | IV                                     | 15 minutes before surgery                                                     | Prototype (Hamamatsu)                      | NA                       | Visualization of the biliary anatomy and cystic artery | CyD (93%), CHD (96%), CHD (c), and CyD-CHD junction (c) (n=28). Cystic artery was identified in 89% cases                                            | NA                                                                      | NA                                                    | None           | NA            | NA                                                                                                                                                                                                                                             | Kaneko J, Ishizawa T, Maeda K, Kawaguchi Y, Aoki T, Sakamoto Y, et al. Surg Laparosc Endosc Percutan Tech. 2012;22(1):31-4.          |                                                                                                                                       |
| 10       | Scherwitzer | US              | J Gastrointest Surg                | 2012 | Case report   | Lap-cholecystectomy                                | 1                    | ICG               | 1cm <sup>3</sup>                                                          | IV                                     | Prior to surgery                                                              | PRINPOINT (Novadaq)                        | NA                       | Feasibility                                            | Cystic duct visualized                                                                                                                               | CyD could be divided distal to the anomalous duct                       | NA                                                    | NA             | None          | NA                                                                                                                                                                                                                                             | NA                                                                                                                                   | Scherwitzer DA. J Gastrointest Surg. 2012;16(10):114-5.                                                                               |
| 11       | Chalmyal    | US              | Liver Int                          | 2012 | Case report   | Robot cholecystectomy                              | 1                    | ICG               | NA                                                                        | IV                                     | NA                                                                            | NA                                         | NA                       | Feasibility                                            | Identification of aberrant communicating from segment VI to CHD                                                                                      | NA                                                                      | NA                                                    | None           | NA            | NA                                                                                                                                                                                                                                             | Chalmyal D, Nohse L, Ell EF, Ghalambor PC. Liver International. 2012;32(4):602-607.                                                  |                                                                                                                                       |
| 12       | Schols      | The Netherlands | Surg Endosc                        | 2013 | Prospective   | Lap-cholecystectomy                                | 15                   | ICG               | 2.5mg                                                                     | IV                                     | After induction of anaesthesia                                                | Imaging system (Karl Storz)                | Fluorescence intensity   | Time to identification of the biliary anatomy          | CyD (100%), CHD (c), CHD (100%), and CyD-CHD junction (c)                                                                                            | NA                                                                      | NA                                                    | None           | NA            | NA                                                                                                                                                                                                                                             | Schols RM, Bouvy ND, Maucke AA, van Dam RM, Dujong CH, Sassen LP. Surg Endosc. 2013;27(5):1539-6.                                    |                                                                                                                                       |
| 13       | Spingolo    | Italy           | Surg Endosc                        | 2013 | Prospective   | Robotic single site cholecystectomy                | 45                   | ICG               | 2.5mg                                                                     | IV                                     | 30-40 min prior to start of operation                                         | da Vinci Fluorescent Imaging Vision System | NA                       | Visualization of the biliary anatomy                   | CyD (100%), CHD (100%), CHD (100%), and CyD-CHD junction (100%).                                                                                     | NA                                                                      | NA                                                    | None           | NA            | NA                                                                                                                                                                                                                                             | Spingolo G, Priera F, Bianchi PP, Lucido FS, Lucardello A, Magliore V, et al. Surg Endosc. 2013;27(6):1566-62.                       |                                                                                                                                       |
| 14       | Buchs       | Switzerland     | Surg Endosc                        | 2013 | Prospective   | Robotic single site cholecystectomy                | 23 (+21 control)     | ICG               | 2.5mg                                                                     | IV                                     | 30-45 min prior to start of operation                                         | da Vinci (Intuitive Surgery)               | NA                       | Operative outcomes                                     | NA                                                                                                                                                   | NA                                                                      | None                                                  | NA             | NA            | The overall operative time was shorter for the FC group, especially for patients with a body mass index (BMI) equal or less than 25 (24 min) but without reaching statistical significance (P=0.06). For BMI>25, no differences were observed. | Buchs NC, Pugin F, Arganyi DE, Jung M, Volonté F, Hagen ME, et al. Surg Endosc. 2013;27(10):3897-901.                                |                                                                                                                                       |
| 15       | Schols      | The Netherlands | Surg Endosc                        | 2013 | Prospective   | Lap-cholecystectomy                                | 30                   | ICG               | 2.5mg                                                                     | IV                                     | After induction of anaesthesia                                                | Imaging system (Karl Storz)                | Fluorescence intensity   | Time to identification of the biliary anatomy          | CyD (83%), CHD (c), CHD (87%), and CyD-CHD junction (c)                                                                                              | NA                                                                      | NA                                                    | None           | NA            | NA                                                                                                                                                                                                                                             | Schols RM, Bouvy ND, van Dam RM, Maucke AA, Dujong CH, Sassen LP. Surg Endosc. 2013;27(12):4511-7.                                   |                                                                                                                                       |
| 16       | Mohsen      | Egypt           | Surg Innov                         | 2013 | Case series   | Lap-cholecystectomy                                | 5                    | Fluorescein       | 7.5mg/kg                                                                  | IV                                     | After induction of pneumoperitoneum                                           | Device designed by the authors             | NA                       | Visualization of the biliary anatomy                   | 100% (the extrahepatic duct)                                                                                                                         | NA                                                                      | NA                                                    | None           | NA            | NA                                                                                                                                                                                                                                             | Mohsen AA, Elbawany MS, Fawzy YS. Surg Innov. 2013;16(1):105-8.                                                                      |                                                                                                                                       |
| 17       | Dip         | US              | Surg Endosc                        | 2014 | Prospective   | Lap-cholecystectomy                                | 43                   | ICG               | 0.05mg/kg                                                                 | IV                                     | 1 hour prior to surgery                                                       | D-light P light-source unit (Karl Storz)   | NA                       | Visualization of the biliary anatomy, cost             | 93% success rate; CyD (98% before dissection), CHD (95%), CHD (99%), and CyD-CHD junction (c)                                                        | NA                                                                      | NA                                                    | None           | NA            | NA                                                                                                                                                                                                                                             | The costs per surgery generated by the use of ICG are greater than the costs of using FC (US\$778.43 ± 0.48 vs. US\$1111.11 ± 1.11). | Dip FD, Aebun D, Roudsack Vekterman A, Le Manno E, Stiefelmeier CH, Strommer S, et al. Surg Endosc. 2014;28(6):1338-43. (p < 0.0001). |
| 18       | Prestet     | France          | J Gastrointest Surg                | 2014 | Prospective   | Lap-cholecystectomy                                | 23                   | ICG               | 0.5mg/kg                                                                  | IV                                     | After induction of anaesthesia                                                | NIR 1 (Karl Storz)                         | NA                       | Visualization of the biliary anatomy                   | CyD (61% before dissection), CHD (100% after dissection), CHD (17%), CHD (14%), and CyD-CHD junction (14%).                                          | NA                                                                      | NA                                                    | None           | NA            | NA                                                                                                                                                                                                                                             | Prestet F, Robbe L, Cisse C, Brovet F, Sabhagh C, Regimbeau JM. J Gastrointest Surg. 2014;18(10):1462-8.                             |                                                                                                                                       |
| 19       | Larsen      | Denmark         | Dan Med J                          | 2014 | Prospective   | Lap-cholecystectomy                                | 35                   | ICG               | 0.05mg/kg                                                                 | IV                                     | After induction of anaesthesia                                                | Laparoscopic Imaging System (Olympus)      | NA                       | Visualization of the biliary anatomy                   | CyD (100%), CHD (100%), CHD (100%), and CyD-CHD junction (100%).                                                                                     | NA                                                                      | NA                                                    | None           | NA            | NA                                                                                                                                                                                                                                             | An extra-hepatic aberrant bile duct entering into CHD was identified by FC and left intact in one case.                              | Larsen SS, Schibye S, Biggaard T, Dan Med J. 2014;61(8):A4891.                                                                        |
| 20       | Dzulkifli   | US              | Surg Innov                         | 2014 | Retrospective | Robotic cholecystectomy                            | 184                  | ICG               | 2.5mg                                                                     | IV                                     | 45 minutes before surgery                                                     | da Vinci (Intuitive Surgery)               | NA                       | Visualization of the biliary anatomy                   | CyD (84%), CHD (98%), CHD (98%), and CyD-CHD junction (84%).                                                                                         | NA                                                                      | NA                                                    | None           | NA            | NA                                                                                                                                                                                                                                             | An anatomical variation of the biliary tree was identified by FC in 5.                                                               | Dzulkifli D, Fernandez F, Wang X, Hinson JM, Ell EF, Aylko S, et al. Surg Innov. 2014;17(1):61S-21.                                   |

| Author     | Country         | Journal                      | Year | Study Type    | Procedure                                    | n                        | ICG | Concentration | Timing | System                                | Fluorescence Intensity                                                | Visualization          | Findings                                                                                                 | Conclusion                                                                                                                                                                                                                                                              | Comparison                                                                                                 | Notes |      |                                                                                                                                                                                                          |                                                                                                                                                                                                                                                                                                                                                                                                                                                                                                                                                                                                                                                          |
|------------|-----------------|------------------------------|------|---------------|----------------------------------------------|--------------------------|-----|---------------|--------|---------------------------------------|-----------------------------------------------------------------------|------------------------|----------------------------------------------------------------------------------------------------------|-------------------------------------------------------------------------------------------------------------------------------------------------------------------------------------------------------------------------------------------------------------------------|------------------------------------------------------------------------------------------------------------|-------|------|----------------------------------------------------------------------------------------------------------------------------------------------------------------------------------------------------------|----------------------------------------------------------------------------------------------------------------------------------------------------------------------------------------------------------------------------------------------------------------------------------------------------------------------------------------------------------------------------------------------------------------------------------------------------------------------------------------------------------------------------------------------------------------------------------------------------------------------------------------------------------|
| 21 Morita  | Japan           | Asian J Endosc Surg          | 2014 | Case report   | Full-thickness laparoscopic cholecystectomy  | 1                        | ICG | 2.5mg         | IV     | After induction of anaesthesia        | Prototype (Olympus)                                                   | NA                     | Visualization of the biliary anatomy and boundaries between the liver and gallbladder bed was identified | NA (boundaries between the liver and gallbladder bed was identified)                                                                                                                                                                                                    | NA                                                                                                         | None  | NA   | NA                                                                                                                                                                                                       | There was a learning curve effect associated with performing FC, with the first 41 cases requiring 2.7 ± 2.9 min compared to 1.2 ± 0.7 min for the final 41 cases (p < 0.001).                                                                                                                                                                                                                                                                                                                                                                                                                                                                           |
| 22 Ouyang  | US              | Surg Endosc                  | 2015 | Prospective   | Lap-cholecystectomy                          | 82                       | ICG | 2.5mg         | IV     | 60 minutes prior to surgical incision | Indocyanine Fluorescence (IBF) Imaging System (Stryker)               | NA                     | Visualization of the biliary anatomy                                                                     | NA                                                                                                                                                                                                                                                                      | None                                                                                                       | NA    | None | FC required 1.9 ± 1.7 min to complete compared to 11.8 ± 5.3 min for IOC (p < 0.001). In 20 patients where IOC could not be obtained, FC successfully identified biliary structures in 98% of the cases. |                                                                                                                                                                                                                                                                                                                                                                                                                                                                                                                                                                                                                                                          |
| 23 Dip     | US              | Surg Endosc                  | 2015 | Prospective   | Lap-cholecystectomy                          | 45                       | ICG | 0.05mg/kg     | IV     | 1 hour prior to surgery               | D-light P light-source unit (Karl Storz)                              | NA                     | Visualization of the biliary anatomy                                                                     | CyD (98%), CHD (90%), CBD (98%), and CyD-CHD junction (-)                                                                                                                                                                                                               | NA                                                                                                         | None  | NA   | NA                                                                                                                                                                                                       | No significant time difference between the two groups (0.77 ± 0.3 vs 0.65 min).                                                                                                                                                                                                                                                                                                                                                                                                                                                                                                                                                                          |
| 24 Bani    | Italy           | Surg Endosc                  | 2015 | Retrospective | Lap-cholecystectomy                          | 52 (56 other procedures) | ICG | 0.04mg/kg     | IV     | At least 15 minutes before surgery    | Laparoscopic system (Karl Storz)                                      | NA                     | Visualization of the biliary anatomy                                                                     | CyD (-), CHD (+), CHD (-), and CyD-CHD junction (100%)<br>CyD (37% before dissection/97% after dissection), CHD (+), CHD (-) (97%/97%), and CyD-CHD junction (-)                                                                                                        | NA                                                                                                         | None  | NA   | NA                                                                                                                                                                                                       | Comparison with IOC                                                                                                                                                                                                                                                                                                                                                                                                                                                                                                                                                                                                                                      |
| 25 van Dam | The Netherlands | J Laparoscopic Adv Surg Tech | 2015 | Prospective   | Lap-cholecystectomy                          | 30                       | ICG | 0.05mg/kg     | IV     | After induction of anaesthesia        | Laparoscopic Imaging System (Olympus)                                 | NA                     | Visualization of the biliary anatomy                                                                     | FC visualized the CBD and CyD at 11 minutes (P: 08) and 8.6 minutes (P: 08) earlier than with a conventional video table camera                                                                                                                                         | NA                                                                                                         | None  | NA   | NA                                                                                                                                                                                                       | van Dam DA, Ankerom M, de Von P, van Rooijen AS, Toyama JB, Meijerik WJ. J Laparoscopic Adv Surg Tech A. 2015;25(6):486-92                                                                                                                                                                                                                                                                                                                                                                                                                                                                                                                               |
| 26 Kono    | Japan           | Medicine                     | 2015 | Prospective   | Lap-cholecystectomy                          | 108                      | ICG | 2.5mg         | IV     | Prior to surgery                      | Laparoscopic imaging system (prototype, Olympus, Karl Storz, Novadaq) | Fluorescence intensity | Visualization of the biliary anatomy, optimal timing of ICG administration                               | CyD (81% before dissection/95% after dissection), CHD (87%/93%), CHD (-), and CyD-CHD junction (100%)<br>Accessory hepatic ducts were detected using FC after dissecting Calot's triangle in 9 of 10 cases.                                                             | FC allowed for visualization of gallstones in the CyD in 5 patients, leading to adjustment of CyD division | NA    | None | NA                                                                                                                                                                                                       | The interval between ECG injection and FC before dissection of Calot's triangle was significantly longer in the 30 patients in whom the CyD-CHD confluence was detected by fluorescence imaging before dissection (median, 99 mm, range, 15–165 mm) than in the remaining 28 patients in whom the confluence was undetectable (median, 47 mm, range, 21–205 mm, P=0.01). Equipment features                                                                                                                                                                                                                                                              |
| 27 Dip     | US              | Obes Surg                    | 2016 | Prospective   | Lap-cholecystectomy                          | 71                       | ICG | 0.05mg/kg     | IV     | 1 hour prior to surgery               | D-light P light-source unit (Karl Storz)                              | NA                     | Visualization of the biliary anatomy in morbidly obese subjects                                          | CyD (100% before dissection), CHD (79%), CHD (87%), and CyD-CHD junction (-)<br>An accessory duct was seen in 7 cases<br>No differences in CHD, CBD, and accessory duct visualization were detected in the obese and non-obese groups (p value: 0.09, 0.16, and n.e.s.) | NA                                                                                                         | None  | NA   | Comparison patients with BMI >30 and below 30.                                                                                                                                                           |                                                                                                                                                                                                                                                                                                                                                                                                                                                                                                                                                                                                                                                          |
| 28 Igami   | Japan           | Surg Today                   | 2016 | Prospective   | Single-incision laparoscopic cholecystectomy | 21                       | ICG | 2.5mg         | IV     | After endotracheal intubation         | D-light P light-source unit (Karl Storz)                              | NA                     | Visualization of the biliary anatomy                                                                     | CyD (48% before dissection), CHD (11%), CHD (-), and CyD-CHD junction (71%)                                                                                                                                                                                             | NA                                                                                                         | None  | NA   | NA                                                                                                                                                                                                       | The mean operative time for the patients in whom FC could identify the running course of the cystic duct before dissection in Calot's triangle was significantly shorter than those in whom it could not (68 ± 16 min (range 51–98 min) vs. 91 ± 33 min (range 45–151 min)). Lower detection rate in patients: 83% of the surgeons strongly agreed that FC incorporated smoothly into the operation, 67% strongly agreed that the equipment was easy to set up, 92% strongly agreed that the equipment did not impede operating room space, 75% strongly agreed that FC facilitated identification of biliary anatomy, and 58% thought it was helpful in |
| 29 Zdoback | Canada          | Am J Surg                    | 2016 | Retrospective | Lap-cholecystectomy                          | 12                       | ICG | 3.75mg        | IV     | In the preholding area                | NA                                                                    | NA                     | Visualization of the biliary anatomy and perceived benefit for surgeons                                  | CyD (100%), CHD (99%), CHD (83%), and CyD-CHD junction (-)                                                                                                                                                                                                              | NA                                                                                                         | None  | NA   | NA                                                                                                                                                                                                       | Zdoback C, Chow G, Meneghini A, Wanasick G, Melsche M, Chia CJ, et al. Am J Surg. 2016;211(5):633-7                                                                                                                                                                                                                                                                                                                                                                                                                                                                                                                                                      |

| Author       | Country                              | Year | Study Design    | Intervention                                                    | Control | Sample Size                                                        | Drug                       | Route | Timing                                                              | Device                                             | Outcome                              | Notes                                                                                                                                                                                                                                                                                                                                                                                               | Reference                                                                                                                                                                                        |      |                                                                                                                                                                 |                                                                                                                                                                                                                                                  |
|--------------|--------------------------------------|------|-----------------|-----------------------------------------------------------------|---------|--------------------------------------------------------------------|----------------------------|-------|---------------------------------------------------------------------|----------------------------------------------------|--------------------------------------|-----------------------------------------------------------------------------------------------------------------------------------------------------------------------------------------------------------------------------------------------------------------------------------------------------------------------------------------------------------------------------------------------------|--------------------------------------------------------------------------------------------------------------------------------------------------------------------------------------------------|------|-----------------------------------------------------------------------------------------------------------------------------------------------------------------|--------------------------------------------------------------------------------------------------------------------------------------------------------------------------------------------------------------------------------------------------|
| 30 Noji      | Japan                                | 2016 | Case report     | Single-incision laparoscopic cholecystectomy                    |         | 1                                                                  | 2.5mg                      | IV    | After endotracheal intubation                                       | D-light P light-source unit (Karl Storz)           | Visualization of the biliary anatomy | The border of the lesion in the cystic duct was identified. Appropriate resection line could be set                                                                                                                                                                                                                                                                                                 | NA                                                                                                                                                                                               | NA   | Noji M, Igami T, Tanaka H, Toyoda Y, Hoshi T, Yokoyama Y, Nagawa G, Mizuno T, Yamaguchi J, Nagao M. Surg Laparosc Endosc Percutan Tech. 2016 Dec;30(6):170-173. |                                                                                                                                                                                                                                                  |
| 31 Zarmpas   | US                                   | 2016 | Prospective     | Laparoscopic cholecystectomy and other hepatobiliary procedures |         | 37                                                                 | 0.02-0.25 mg/kg            | IV    | 10-180 min prior to planned visualization                           | PIVPOINT (Novadaq)                                 | Fluorescence intensity               | Visualization of the extrahepatic biliary tract improved with increasing doses of ICG, with qualitative scores improving from 1.9 ± 1.2 (out of 5) with a 0.02-mg/kg dose to 3.4 ± 1.3 with a 0.25-mg/kg dose (P = .05 for 0.02 vs 0.25 mg/kg). Visualization was also significantly better with increased time after ICG administration (1.1 ± 0.3 for 10 minutes vs 3.4 ± 1.1 for 45 minutes, P < | NA                                                                                                                                                                                               | None | NA                                                                                                                                                              | Zarmpas A, Dutton EP, Kibbey C, Bussell RW, Lewis CE, Elms A, Choate A, Hines OJ, Agopian VJ, Cheema A. Surg Laparosc Endosc Percutan Tech. 2016 Aug;23(4):360-5.                                                                                |
| 32 Gangemi   | US                                   | 2017 | Retrospective   | Robotic cholecystectomy                                         |         | 676 (+289 control)                                                 | 2.5mg                      | IV    | 45 minutes prior to surgery                                         | da Vinci (Intuitive Surgical)                      | NA                                   | Reduction in open conversion rate                                                                                                                                                                                                                                                                                                                                                                   | IC with FC resulted in the highest percentage of biliary anomalies identified (2.97%).                                                                                                           | None | NA                                                                                                                                                              | Gangemi A, Danilowicz R, Elt E, Bianco F, Moser M, Giuliamoni PC. J Robot Surg. 2017;11(1):37-42.                                                                                                                                                |
| 33 Ankerst   | The Netherlands                      | 2017 | Prospective     | Lap-cholecystectomy                                             |         | 20                                                                 | 0.2mg/kg                   | IV    | After induction of anesthesia                                       | Laparoscopic Imaging System (Olympus)              | NA                                   | Visualization of the biliary anatomy                                                                                                                                                                                                                                                                                                                                                                | ICD (22% before dissection), CHD (1), and C/D-CHD junction (1) In 1 patient, conversion could be prevented by detecting the CD and CHD with FC before CVS was reached                            | None | NA                                                                                                                                                              | Ankerst M, van Dam DA, van Hapfel AS, van den Heuvel B, Teeyman JB, Meijerink W. Surg Innov. 2017;24(3):248-52.                                                                                                                                  |
| 34 Hoogrod   | The Netherlands                      | 2017 | Prospective     | Lap-cholecystectomy                                             |         | 28                                                                 | 5mg (n=18) or 10 mg (n=12) | IV    | 30 minutes, 2h, 4h, 6h, or 24h before surgery                       | D-light P light-source unit (Karl Storz)           | Fluorescence intensity               | Visualization of the biliary anatomy, optimal timing and dose of ICG administration                                                                                                                                                                                                                                                                                                                 | The highest bile duct-to-artery ratio was achieved 3 to 7 hours after administration of 5 mg and 5 to 23 hours after administration of 10 mg                                                     | None | NA                                                                                                                                                              | Hoogrod LDF, Handgraaf HM, Bauman YAL, Lam HD, Meeg JSD, van der Made WJ, et al. Surg Innov. 2017;24(4):386-96.                                                                                                                                  |
| 35 Graves    | US                                   | 2017 | Prospective     | Lap-cholecystectomy                                             |         | 11                                                                 | 0.25mg                     | IV    | Gallbladder injection During surgery                                | Laparoscopic Imaging System (Styker)               | NA                                   | Visualization of the biliary anatomy                                                                                                                                                                                                                                                                                                                                                                | ICD (91%), CHD (1), and C/D-CHD junction (0%). Mean time to obtain relevant images was shorter with FC versus augmented reality (P = 0.0001) and versus ICG (P = 0.0000000001)                   | None | NA                                                                                                                                                              | Graves C, Ely S, Idowu O, Newton C, Kim J. Laparosc Endosc Adv Surg Tech A. 2017;9(3):79-83. doi:10.1067/1073.                                                                                                                                   |
| 36 Diana     | France                               | 2017 | Prospective     | Robotic cholecystectomy                                         |         | 54                                                                 | 0.1-0.4mg/kg               | IV    | 45 to 60 minutes before surgery                                     | da Vinci Firefly (Intuitive Surgical)              | NA                                   | Visualization of the biliary anatomy                                                                                                                                                                                                                                                                                                                                                                | Mean time to obtain relevant images was shorter with FC versus augmented reality (P = 0.0001) and versus ICG (P = 0.0000000001)                                                                  | None | NA                                                                                                                                                              | Diana M, Sider L, Agius V, D'Elia A, Via M, Dellekamps H, et al. Ann Surg. 2017 Nov;266(5):899-897.                                                                                                                                              |
| 37 Meker     | US                                   | 2017 | Prospective     | Robotic cholecystectomy                                         |         | 35                                                                 | 2.5mg                      | IV    | At the time of intubation                                           | da Vinci Firefly (Intuitive Surgical)              | NA                                   | Visualization of the biliary anatomy                                                                                                                                                                                                                                                                                                                                                                | 100% IOC or conversion to open was avoided in some cases                                                                                                                                         | None | NA                                                                                                                                                              | Meker AV, Kanda N. J Gastrointest Surg. 2017 Nov;71(11):1941-1947.                                                                                                                                                                               |
| 38 Roy       | US                                   | 2017 | Prospective     | Lap-cholecystectomy                                             |         | 10                                                                 | 0.05mg/kg                  | IV    | Before surgery                                                      | D-light P light-source unit (Karl Storz)           | NA                                   | Identification of the biliary anatomy by students and residents                                                                                                                                                                                                                                                                                                                                     | NA                                                                                                                                                                                               | None | NA                                                                                                                                                              | Roy M, Dip F, Nguyen D, Stimpfendorfer CH, Meena EL, Swaminathan S, Rosenthal RJ. Surg Endosc. 2017 Jun;31(6):2483-2490.                                                                                                                         |
| 39 Liu       | Taiwan                               | 2018 | Prospective     | Lap-cholecystectomy                                             |         | 46                                                                 | 10ul (1.25mg/ml)           | IV    | Gallbladder injection During surgery                                | D-light P light-source unit (Karl Storz)           | NA                                   | Visualization of the relevant biliary structures                                                                                                                                                                                                                                                                                                                                                    | In patients with cholecystitis, 84% visualization of Hartmann's pouch prior to dissection, 66.84% visualization of the extrahepatic ducts after dissection, which were significantly better than | None | NA                                                                                                                                                              | Liu YY, Liao CH, Diana M, Wang SY, Kou SH, Yeh CN, et al. Surg Endosc. 2018 Mar;32(3):1506-1514.                                                                                                                                                 |
| 40 Hiwatashi | Japan                                | 2018 | Prospective     | Lap-cholecystectomy                                             |         | 65                                                                 | 2.5mg                      | IV    | 2 hours before surgery                                              | D-light P light-source unit (Karl Storz)           | Fluorescence intensity               | Delineation of the extrahepatic biliary anatomy                                                                                                                                                                                                                                                                                                                                                     | C/D (83.1%)                                                                                                                                                                                      | None | NA                                                                                                                                                              | Hiwatashi K, Okumura H, Setoyama T, Ando K, Ogura Y, Andono K, Machibara R, Natsugoe S. Medicine (Baltimore). 2018 Jul;97(13):e1654.                                                                                                             |
| 41 Tsutani   | Japan                                | 2018 | Prospective     | Lap-cholecystectomy                                             |         | 72                                                                 | 25mg                       | IV    | Immediately before surgery, 3h, 6h, 12h, 18h, or 24h before surgery | PIVPOINT (Novadaq)                                 | Fluorescence intensity               | Optimal timing of ICG administration                                                                                                                                                                                                                                                                                                                                                                | The proportion of cases in which evaluators classified the viability of the gallbladder and bile ducts as grade A (best viability) reached a peak in the 12h group and                           | None | NA                                                                                                                                                              | Tsutani N, Yoshida M, Nakagawa H, Ho E, Inoue R, Suzuki N, et al. Asian J Endosc Surg. 2018 Aug;11(3):199-205.                                                                                                                                   |
| 42 Sharma    | US                                   | 2018 | Retrospective   | Robotic cholecystectomy                                         |         | 96 (+191 lap-cholecystectomy without fluorescence cholangiography) | NA                         | IV    | NA                                                                  | da Vinci Firefly (Intuitive Surgical)              | NA                                   | Incidence of open conversion                                                                                                                                                                                                                                                                                                                                                                        | ICD (2.7%), CHD (1), and C/D-CHD junction (0%). Mean time to obtain relevant images was shorter with FC versus augmented reality (P = 0.0001) and versus ICG (P = 0.0000000001)                  | None | NA                                                                                                                                                              | Sharma S, Huang R, Hsu S, Smith AC, Cheng P, Schwartzman A, et al. J Robot Surg. 2018 Sep;12(3):401-405.                                                                                                                                         |
| 43 Dip       | US, Argentina, Germany, Italy, Japan | 2019 | RCT (3 centers) | Lap-cholecystectomy                                             |         | 321 (+318 control)                                                 | 0.05 mg/kg                 | IV    | At least 45 min before surgery                                      | Image 3 S system with OPAL technology (Karl Storz) | NA                                   | Visualization of the biliary anatomy                                                                                                                                                                                                                                                                                                                                                                | ICD (91%), CHD (1), and C/D-CHD junction (0%). Mean time to obtain relevant images was shorter with FC versus augmented reality (P = 0.0001) and versus ICG (P = 0.0000000001)                   | None | NA                                                                                                                                                              | Dip F, LoMonte E, Sarrillo L, Pillitteri F, Todorich H, Nahrend M, Abe I, Schneider S, Kaji I, Bost L, Ferrana P, Ceras T, Kobasa N, Ishikawa T, Walsh M, Stimpfendorfer C, Meijerink R, White K, Rosenthal RJ. Am Surg. 2019 Dec;75(9):992-999. |

Statistically significant variations were found between RC with FC and LC in minor biliary injuries ( $p = 0.049$ ), overall open conversion ( $p = 0.001$ ), open conversion in the acute setting ( $p = 0.002$ ), and mean blood loss ( $p < 0.001$ ). RC with FC resulted in the lowest percentages of major biliary injuries (8%).

In cases of lithiasis with no inflammation, NIR cholecystochoangiography visualization rate was similar to that of White Light observation.

Total OR time was significantly shorter in the laparoscopic group than the robotic with FC group (98.2 vs 115.7,  $p < 0.001$ ).

Image quality scores were lower with FC versus augmented reality ( $P = 0.018$ ) and versus ICG ( $P < 0.0001$ ).

Subjects identified the biliary anatomy more accurately with a use of fluorescence cholangiography than

ICD (91%), CHD (1), and C/D-CHD junction (0%). Mean time to obtain relevant images was shorter with FC versus augmented reality (P = 0.0001) and versus ICG (P = 0.0000000001)

Fewer open conversions were found in the robotic cholecystectomy with FC than the laparoscopic group [2 (2.1%) vs. 17 (8.9%),  $p = 0.03$ ]. In multiple logistic regression, robotic cholecystectomy with FC also showed a lower risk of conversion compared to laparoscopic cholecystectomy, but the difference did not reach statistical significance (OR 0.42, 95% CI 0.11-1.65,  $p = 0.22$ ).

resection rates were significantly superior in the fluorescence cholangiography group for all 7 biliary structures, ranging from 91.1% versus 2.9% to 66.6% versus 36.6% for the right hepatic duct (RHD) and cystic duct (CD), respectively, with odds ratios ranging from 2.3 (95% CI 1.8-3.2) for the cystic-gallbladder junction to 3.6 (1.6-9.3)

Hospital stay was significantly shorter in the robotic cholecystectomy with FC group than the laparoscopic group (3.0 vs. 1.6,  $p < 0.001$ ).

2 patients in the control group sustained a biliary duct injury

| Author                                                                                                                                                                                                                               | Country  | Journal                        | Year | Study Design            | Intervention                                                                               | n (n= controls)          | ICG | Dose                 | Timing | System                                                                                                         | NA                                                            | Operative outcomes | NA                                                                                           | Patients with fluorescence cholangiography had a markedly lower conversion rate (2.6% vs. 22.0%, p=0.0017) and lower proportion of subtotal cholecystectomy (0.0% vs. 6.6%, p=0.0359) than patients without ICG fluorescence imaging. | Patients with fluorescence cholangiography had a significantly shorter operative time (129 vs 46 vs. 150 vs 56 min, p=0.0455).                                       | NA                                                                                                                                                                             | NA   |    |                                                                                                                                                                                                                                                          |
|--------------------------------------------------------------------------------------------------------------------------------------------------------------------------------------------------------------------------------------|----------|--------------------------------|------|-------------------------|--------------------------------------------------------------------------------------------|--------------------------|-----|----------------------|--------|----------------------------------------------------------------------------------------------------------------|---------------------------------------------------------------|--------------------|----------------------------------------------------------------------------------------------|---------------------------------------------------------------------------------------------------------------------------------------------------------------------------------------------------------------------------------------|----------------------------------------------------------------------------------------------------------------------------------------------------------------------|--------------------------------------------------------------------------------------------------------------------------------------------------------------------------------|------|----|----------------------------------------------------------------------------------------------------------------------------------------------------------------------------------------------------------------------------------------------------------|
| 44 Yoshida                                                                                                                                                                                                                           | Japan    | World J Surg                   | 2019 | Retrospective           | Lap-cholecystectomy following postoperative percutaneous transhepatic gallbladder drainage | 39 (+91 control)         | ICG | 2.5mg                | IV     | After induction of anesthesia                                                                                  | Image 1 SPiES system (Karl Storz)                             | NA                 | Operative outcomes                                                                           | NA                                                                                                                                                                                                                                    | Patients with fluorescence cholangiography had a significantly shorter operative time (129 vs 46 vs. 150 vs 56 min, p=0.0455).                                       | NA                                                                                                                                                                             | NA   |    |                                                                                                                                                                                                                                                          |
| 45 Esposto                                                                                                                                                                                                                           | Italy    | Pediatr Surg Int               | 2019 | Case series             | Lap-cholecystectomy (pediatric)                                                            | 5 (+41 other procedures) | ICG | 0.4mg/kg             | IV     | 1h prior to the procedure                                                                                      | Image 1 S system with D-LIGHT P (Karl Storz)                  | NA                 | Visualization of the biliary anatomy                                                         | 100%                                                                                                                                                                                                                                  | NA                                                                                                                                                                   | NA                                                                                                                                                                             | NA   |    |                                                                                                                                                                                                                                                          |
| 46 Esposto                                                                                                                                                                                                                           | Italy    | J Laparoendosc Adv Surg Tech A | 2019 | Retrospective           | Lap-cholecystectomy (pediatric)                                                            | 15 (+200 control)        | ICG | 0.4mg/kg             | IV     | 1h prior to the procedure                                                                                      | Image 1 S system with D-LIGHT P (Karl Storz)                  | NA                 | Operative outcomes                                                                           | 100%                                                                                                                                                                                                                                  | NA                                                                                                                                                                   | The average operative time was 69 minutes and fell down to 52 minutes after introduction of ICG fluorescence (P= .001).                                                        | NA   | NA |                                                                                                                                                                                                                                                          |
| 47 Iwasaki                                                                                                                                                                                                                           | Japan    | Int J Surg Case Rep            | 2019 | Case report             | Open cholecystectomy with full thickness dissection                                        | 1                        | ICG | 2.5mg                | IV     | Prior to surgery                                                                                               | NA                                                            | NA                 | Feasibility                                                                                  | Aberrant subvesical bile duct was successfully identified                                                                                                                                                                             | Ligation of the aberrant subvesical bile duct                                                                                                                        | No postoperative bile leak                                                                                                                                                     | None | NA | NA                                                                                                                                                                                                                                                       |
| 48 Fernandez-Bautista                                                                                                                                                                                                                | Spain    | European J Pediatr Surg Rep    | 2019 | Case report             | Lap-cholecystectomy (pediatric)                                                            | 1 (+4 other procedures)  | ICG | 0.2mg/kg             | IV     | NA                                                                                                             | A high-definition camera (10 mm) (Stryker)                    | NA                 | Feasibility                                                                                  | The extraperitoneal biliary anatomy was identified                                                                                                                                                                                    | NA                                                                                                                                                                   | NA                                                                                                                                                                             | None | NA | NA                                                                                                                                                                                                                                                       |
| 49 Kitamura                                                                                                                                                                                                                          | Japan    | Int J Surg Case Rep            | 2019 | Case report             | Lap-cholecystectomy                                                                        | 1                        | ICG | 2.5mg                | IV     | Following induction of anesthesia                                                                              | D-light P system (Karl Storz)                                 | NA                 | Feasibility                                                                                  | The unexpected subvesical bile ducts were identified                                                                                                                                                                                  | Ligation of the aberrant subvesical bile ducts                                                                                                                       | No postoperative bile leak                                                                                                                                                     | None | NA | NA                                                                                                                                                                                                                                                       |
| 50 Anbe                                                                                                                                                                                                                              | Germany  | Patient Saf Surg               | 2019 | Retrospective           | Lap-cholecystectomy                                                                        | 29 (+41 control)         | ICG | 0.5 mL               | IV     | 1h prior to surgery                                                                                            | FINPOINT (Novadaq)                                            | NA                 | Operative outcomes                                                                           | NA                                                                                                                                                                                                                                    | The rate of conversion was 2.4% in the group without ICG, while no conversion was performed in the group with ICG.                                                   | The median duration of surgery was 53.0 vs. 54.0 min while the median length of stay was 2.9 d in the group with and without ICG respectively (statistically not significant). | None | NA | NA                                                                                                                                                                                                                                                       |
| 51 Wang                                                                                                                                                                                                                              | China    | J Int Med Res                  | 2020 | Retrospective           | Lap-cholecystectomy                                                                        | 34 (+36 control)         | ICG | 2.5mg                | IV     | 30min prior to laparoscopic procedure                                                                          | FINPOINT (Novadaq)                                            | NA                 | Identification of the extraperitoneal biliary anatomy and operative outcomes                 | 100% success rate<br>CyD (91% before dissection), CHD (33%), CHD (79%), and CyD-CHD junction (-)                                                                                                                                      | The median operation time and intraoperative blood loss were not significantly different between the two groups.                                                     | None                                                                                                                                                                           | NA   | NA | Fluorescence cholangiography was more effective for visualizing biliary structures in patients with a BMI of <25 than >25 kg/m <sup>2</sup> .                                                                                                            |
| 52 Koong                                                                                                                                                                                                                             | Malaysia | Asian J Surg                   | 2020 | RCT                     | Lap-cholecystectomy                                                                        | 30 (+33 control)         | ICG | 2.5mg                | IV     | Before induction of anesthesia                                                                                 | Near infrared camera (Karl Storz)                             | NA                 | Early identification of critical view of safety (CVS)                                        | Mean time (min) to achieve CVS was 22.3 ± 12.9 in FC-LC (n = 30) and 22.8 ± 14.3 in conventional LC (p = 0.867).                                                                                                                      | NA                                                                                                                                                                   | NA                                                                                                                                                                             | None | NA | FC-LC induces time to CVS across all difficulty categories but not statistically significant.                                                                                                                                                            |
| 53 Matsumura                                                                                                                                                                                                                         | Japan    | J HepatoBiliary Pancreat Sci   | 2020 | Prospective             | Lap-cholecystectomy                                                                        | 20                       | ICG | 2.5 mg or 0.25 mg/kg | IV     | After intubation (2.5mg, surgery-day group) or in the evening before surgery (0.25mg/kg, one-day-before group) | FINPOINT (Novadaq)                                            | NA                 | Signal to background ratio                                                                   | CHD-Liver, 0.6-1.2 vs 2.5, 0.9 vs 4.8, P < .001, and CHD-HDL, control (1.7, 1.4-2.4 vs 2.3, 1.5-12.2, P = .038) were significantly higher in the one-day-before group than in the control, two groups.                                | NA                                                                                                                                                                   | NA                                                                                                                                                                             | None | NA | Matsumura M, Kawaguchi Y, Kobayashi Y, Kobayashi N, Ishizawa T, Akamatsu N, Kamada T, Arita K, Kakino N, Higashigawa K. J HepatoBiliary Pancreat Sci. 2020 Oct 22; doi: 10.1002/jbpr.855.                                                                |
| 54 Di Maggio                                                                                                                                                                                                                         | UK       | Surg Innov                     | 2020 | Prospective             | Lap-cholecystectomy (emergency)                                                            | 31 (+24 control)         | ICG | 0.25 mg              | IV     | 30 min prior to surgery                                                                                        | 4K laparoscopic stack with NIR technology provided by Olympus | NA                 | NA                                                                                           | NA                                                                                                                                                                                                                                    | NA                                                                                                                                                                   | Fluorescence cholangiography group had the acute post-operative hospitalization and complications rate of the control group, with a shorter operating time                     | None | NA | NA                                                                                                                                                                                                                                                       |
| 55 Skarabec                                                                                                                                                                                                                          | Spain    | Langenbecks Arch Surg          | 2020 | Retrospective           | Lap-cholecystectomy                                                                        | 20 (+20 control)         | ICG | 0.25 mg/mL           | ICG    | During surgery                                                                                                 | EndEye (Olympus)                                              | NA                 | Visualization of the biliary anatomy and operative outcomes                                  | CyD (100%), CHD (-), CHD (-), and CyD-CHD junction (50%)                                                                                                                                                                              | NA                                                                                                                                                                   | NA                                                                                                                                                                             | None | NA | Compared with lap-cholecystectomy without FC                                                                                                                                                                                                             |
| 56 Nitta                                                                                                                                                                                                                             | Japan    | Ann Med Surg (Lond)            | 2020 | Case report             | Lap-cholecystectomy                                                                        | 1                        | ICG | 0.0025 mg/mL         | ICG    | During surgery                                                                                                 | NA                                                            | NA                 | Feasibility                                                                                  | CyD identified                                                                                                                                                                                                                        | NA                                                                                                                                                                   | NA                                                                                                                                                                             | None | NA | NA                                                                                                                                                                                                                                                       |
| 57 Turcotte                                                                                                                                                                                                                          | US       | Surgery                        | 2020 | Retrospective           | Lap-cholecystectomy (emergency)                                                            | 105 (+93 control)        | ICG | 2.5mg                | IV     | Before surgery                                                                                                 | 1588 system (Stryker)                                         | NA                 | The rate of full-out operation (subtotal cholecystectomy or conversion to an open operation) | CyD (33% in non-acute cholecystitis) / 21% in acute cholecystitis), CHD (-), CHD (79% 63%), and CyD-CHD junction (-)                                                                                                                  | The rate of full-out operation was not different between patients with FC (74 hours vs 107 hours, P = .031). No significant differences in completion were observed. | None                                                                                                                                                                           | NA   | NA |                                                                                                                                                                                                                                                          |
| 58 Asai                                                                                                                                                                                                                              | Japan    | ANZ J Surg                     | 2020 | Case report             | Single-incision laparoscopic cholecystectomy                                               | 1                        | ICG | NA                   | IV     | NA                                                                                                             | NA                                                            | NA                 | Feasibility                                                                                  | Cystohepatic duct identified                                                                                                                                                                                                          | NA                                                                                                                                                                   | NA                                                                                                                                                                             | None | NA | NA                                                                                                                                                                                                                                                       |
| 59 Esposto                                                                                                                                                                                                                           | Italy    | Front Pediatr                  | 2020 | Prospective             | Lap-cholecystectomy (pediatric)                                                            | 12                       | ICG | 0.4mg/kg             | IV     | 15-1h before surgery                                                                                           | Image 1 S system (Karl Storz)                                 | NA                 | Feasibility                                                                                  | 92% success rate                                                                                                                                                                                                                      | NA                                                                                                                                                                   | NA                                                                                                                                                                             | None | NA | NA                                                                                                                                                                                                                                                       |
| 60 Galabro                                                                                                                                                                                                                           | US       | J Laparoendosc Adv Surg Tech A | 2020 | Prospective (2 centers) | Lap-cholecystectomy (pediatric)                                                            | 31                       | ICG | 2.5mg                | IV     | Before trocar placement                                                                                        | NA                                                            | NA                 | Visualization of the biliary anatomy                                                         | CyD (-), CHD (-), CHD (-), and CyD-CHD junction (100%)                                                                                                                                                                                | NA                                                                                                                                                                   | NA                                                                                                                                                                             | None | NA | NA                                                                                                                                                                                                                                                       |
| 61 Rungskulraj                                                                                                                                                                                                                       | Thailand | World J Gastrointest Surg      | 2020 | Case series             | Lap-cholecystectomy                                                                        | 5                        | ICG | 2.5mg                | IV     | 15min before skin incision                                                                                     | NA                                                            | NA                 | The benefit of FC for enhancing identification skills of surgical residents                  | NA                                                                                                                                                                                                                                    | NA                                                                                                                                                                   | NA                                                                                                                                                                             | None | NA | In the without-FC phase, the overall misidentification rate by SRs (21.7%) was greater than that of the SS (11.8%), P = 0.016). However, in the FC phase, the two groups did not significantly differ in misidentification on rates (22.3% vs 11.9%, P = |
| 62 Yoshida S, Mizogawa R, Kamei K, Kasai M, Takemoto K, Yokoyama T, Kimura Y, Koga T, Karai M, Kajiyama K, Yoshinori T, World J Surg. 2019 Jan;31(1):127-133. doi: 10.1007/s00261-018-0167-1                                         |          |                                |      |                         |                                                                                            |                          |     |                      |        |                                                                                                                |                                                               |                    |                                                                                              |                                                                                                                                                                                                                                       |                                                                                                                                                                      |                                                                                                                                                                                |      |    |                                                                                                                                                                                                                                                          |
| 63 Esposto C, Dal Conte F, Corio M, Gargioli F, Izzo S, Esposto G, Spagnuolo ML, Esposito C, Ciccio F, Scimia A, Farina A, Contesse A, Esposto G, Spagnuolo ML, Esposito C. J Laparoendosc Adv Surg Tech A. 2019 Nov;9(9):1195-1199. |          |                                |      |                         |                                                                                            |                          |     |                      |        |                                                                                                                |                                                               |                    |                                                                                              |                                                                                                                                                                                                                                       |                                                                                                                                                                      |                                                                                                                                                                                |      |    |                                                                                                                                                                                                                                                          |
| 64 Iwasaki T, Takayama Y, Yoshida Y, Kawaguchi K, Matsumoto M, Mirase T, Kamei K, Takabe A, Matsumoto I, Nishii T. Int J Surg Case Rep. 2019;61:115-118.                                                                             |          |                                |      |                         |                                                                                            |                          |     |                      |        |                                                                                                                |                                                               |                    |                                                                                              |                                                                                                                                                                                                                                       |                                                                                                                                                                      |                                                                                                                                                                                |      |    |                                                                                                                                                                                                                                                          |
| 65 Fernandez-Bautista H, Mata DP, Fariñas A, Pinedo-Caballero R, De Aguin JC. European J Pediatr Surg Rep. 2019 Jan;7(1):1-6.                                                                                                        |          |                                |      |                         |                                                                                            |                          |     |                      |        |                                                                                                                |                                                               |                    |                                                                                              |                                                                                                                                                                                                                                       |                                                                                                                                                                      |                                                                                                                                                                                |      |    |                                                                                                                                                                                                                                                          |
| 66 Kitamura H, Tsuji T, Yamamoto D, Takahashi T, Kadono S, Kawakami M, Hando H. Int J Surg Case Rep. 2019;67:141-146.                                                                                                                |          |                                |      |                         |                                                                                            |                          |     |                      |        |                                                                                                                |                                                               |                    |                                                                                              |                                                                                                                                                                                                                                       |                                                                                                                                                                      |                                                                                                                                                                                |      |    |                                                                                                                                                                                                                                                          |
| 67 Anbe PC, Planteck J, Fernandez-Cheleng Y, Zarate K. Patient Saf Surg. 2019 Jan 12;12(2). doi: 10.1186/s13037-019-0187-8                                                                                                           |          |                                |      |                         |                                                                                            |                          |     |                      |        |                                                                                                                |                                                               |                    |                                                                                              |                                                                                                                                                                                                                                       |                                                                                                                                                                      |                                                                                                                                                                                |      |    |                                                                                                                                                                                                                                                          |
| 68 Wang C, Peng W, Yang J, Li Y, Yang J, Hu X, Xia L, Zhang L, Zhang Y, Qian L, Fan W. J Int Med Res. 2020 Dec;48(12):30060-30072. doi: 10.1186/s12916-020-1807-8                                                                    |          |                                |      |                         |                                                                                            |                          |     |                      |        |                                                                                                                |                                                               |                    |                                                                                              |                                                                                                                                                                                                                                       |                                                                                                                                                                      |                                                                                                                                                                                |      |    |                                                                                                                                                                                                                                                          |
| 69 Koong JK, Ng GH, Ramayah K, Koh PS, Yong BK. Asian J Surg. 2021 Mar;44(3):537-543. doi: 10.1016/j.asjsur.2020.11.002. Epub 2020 Nov 19.                                                                                           |          |                                |      |                         |                                                                                            |                          |     |                      |        |                                                                                                                |                                                               |                    |                                                                                              |                                                                                                                                                                                                                                       |                                                                                                                                                                      |                                                                                                                                                                                |      |    |                                                                                                                                                                                                                                                          |
| 70 Matsumura M, Kawaguchi Y, Kobayashi Y, Kobayashi N, Ishizawa T, Akamatsu N, Kamada T, Arita K, Kakino N, Higashigawa K. J HepatoBiliary Pancreat Sci. 2020 Oct 22; doi: 10.1002/jbpr.855.                                         |          |                                |      |                         |                                                                                            |                          |     |                      |        |                                                                                                                |                                                               |                    |                                                                                              |                                                                                                                                                                                                                                       |                                                                                                                                                                      |                                                                                                                                                                                |      |    |                                                                                                                                                                                                                                                          |
| 71 Di Maggio Z, Zarate A, Hissari D, Bonomo L. Surg Innov. 2020 Sep 16;15(5):502-505. doi: 10.1177/155335062095852.                                                                                                                  |          |                                |      |                         |                                                                                            |                          |     |                      |        |                                                                                                                |                                                               |                    |                                                                                              |                                                                                                                                                                                                                                       |                                                                                                                                                                      |                                                                                                                                                                                |      |    |                                                                                                                                                                                                                                                          |
| 72 Skarabec C, Pardo Aranda F, Ego F, Cremades M, Navas J, Zarate A, Cugat E. Langenbecks Arch Surg. 2020 Nov;9(9):877-878. doi: 10.1007/s00261-020-0187-8.                                                                          |          |                                |      |                         |                                                                                            |                          |     |                      |        |                                                                                                                |                                                               |                    |                                                                                              |                                                                                                                                                                                                                                       |                                                                                                                                                                      |                                                                                                                                                                                |      |    |                                                                                                                                                                                                                                                          |
| 73 Nitta T, Kakino N, Ohta M, Ueda Y, Senoike S, Kurashima Y, Shimizu T, Ishizawa T. Ann Med Surg. 2020 Jul 18; doi: 10.1177/201325902095852.                                                                                        |          |                                |      |                         |                                                                                            |                          |     |                      |        |                                                                                                                |                                                               |                    |                                                                                              |                                                                                                                                                                                                                                       |                                                                                                                                                                      |                                                                                                                                                                                |      |    |                                                                                                                                                                                                                                                          |
| 74 Turcotte F, Turcotte J, Lejoly RD, Au M, Feather C, Klase JK. Int J Surg Case Rep. 2020 Jun 17;83:14. doi: 10.1016/j.icsur.2020.05.011.                                                                                           |          |                                |      |                         |                                                                                            |                          |     |                      |        |                                                                                                                |                                                               |                    |                                                                                              |                                                                                                                                                                                                                                       |                                                                                                                                                                      |                                                                                                                                                                                |      |    |                                                                                                                                                                                                                                                          |
| 75 Asai Y, Imai T, Ebata T, Yokoyama Y, Mizuno T, Yamaguchi J, Onoe S, Watanabe N, Nagao M. ANZ J Surg. 2020 Jul 18; doi: 10.1177/000545732095852.                                                                                   |          |                                |      |                         |                                                                                            |                          |     |                      |        |                                                                                                                |                                                               |                    |                                                                                              |                                                                                                                                                                                                                                       |                                                                                                                                                                      |                                                                                                                                                                                |      |    |                                                                                                                                                                                                                                                          |
| 76 Esposto C, Scimia A, Dal Conte F, Corio M, Coppola V, Farina A, Ciccio F, Ricciardi E, Esposito G, Esposito M. Front Pediatr. 2020 Jun 17;8:314. doi: 10.3389/fped.2020.00314.                                                    |          |                                |      |                         |                                                                                            |                          |     |                      |        |                                                                                                                |                                                               |                    |                                                                                              |                                                                                                                                                                                                                                       |                                                                                                                                                                      |                                                                                                                                                                                |      |    |                                                                                                                                                                                                                                                          |
| 77 Galabro R, Hennes CM, Vall R. J Laparoendosc Adv Surg Tech A. 2020 May;30(5):286-289.                                                                                                                                             |          |                                |      |                         |                                                                                            |                          |     |                      |        |                                                                                                                |                                                               |                    |                                                                                              |                                                                                                                                                                                                                                       |                                                                                                                                                                      |                                                                                                                                                                                |      |    |                                                                                                                                                                                                                                                          |
| 78 Rungskulraj N, Thevmonkol S, Sangal W, Yassanant W, Tangwattana P, Mangrueksa P, Mingshobhols S, Areeas S. World J Gastroenterol. 2020 Mar 27;12(3):93-103.                                                                       |          |                                |      |                         |                                                                                            |                          |     |                      |        |                                                                                                                |                                                               |                    |                                                                                              |                                                                                                                                                                                                                                       |                                                                                                                                                                      |                                                                                                                                                                                |      |    |                                                                                                                                                                                                                                                          |

|    |            |                                                               |                     |      |                                      |                                                              |                         |     |                                                     |                                       |                                                                                     |                                                                                  |    |                                                                                                                  |                                                                                                                                                                                                                                                                                                                           |      |      |    |    |                                                                                                                                                                                                                                                                         |
|----|------------|---------------------------------------------------------------|---------------------|------|--------------------------------------|--------------------------------------------------------------|-------------------------|-----|-----------------------------------------------------|---------------------------------------|-------------------------------------------------------------------------------------|----------------------------------------------------------------------------------|----|------------------------------------------------------------------------------------------------------------------|---------------------------------------------------------------------------------------------------------------------------------------------------------------------------------------------------------------------------------------------------------------------------------------------------------------------------|------|------|----|----|-------------------------------------------------------------------------------------------------------------------------------------------------------------------------------------------------------------------------------------------------------------------------|
| 62 | Jao        | Taiwan                                                        | Int J Surg Case Rep | 2020 | Case series                          | Lap-cholecystectomy                                          | 2                       | ICG | 12.5mg/5mL                                          | Gallbladder injection through FTGID   | During surgery                                                                      | Image 1 S system (Karl Storz)                                                    | NA | Feasibility                                                                                                      | 100% visualization of CVS                                                                                                                                                                                                                                                                                                 | NA   | None | NA | NA | Zuo ML, Wang YY, Wong HP, Bocharov V, Liu KC. Int J Surg Case Rep. 2020;68:193-197.                                                                                                                                                                                     |
| 63 | Lehrkov    | Denmark                                                       | Br J Surg           | 2020 | RCT                                  | Lap-cholecystectomy                                          | 60 (+60 control)        | ICG | 0.05 mg/kg                                          | IV                                    | Immediately after induction of anaesthesia                                          | S34020 (Olympus)                                                                 | NA | Visualization of the critical junction between the C/D, C/D, and C/D (non-infectious trial)                      | 51 of 60 respectively, P = 0.230. FC was faster by a few minutes: median 2:0 (range 0:5-5:0) versus 4:8 (1:3-17:6) min (P = 0.001).                                                                                                                                                                                       | NA   | None | NA | NA | There was a significant intergroup difference in surgeon-reported ease of cholangiography performance: mean (s.d.) 1.96 (0.89) and 2.36 (1.03) for FC and X-ray cholangiography respectively (95 per cent c.i. for difference -0.82 to 0.82).                           |
| 64 | Bleszyński | Canada                                                        | Surg Innov          | 2020 | Prospective                          | Lap-cholecystectomy                                          | 108                     | ICG | 4mg                                                 | IV                                    | After endotracheal tube placement                                                   | NA                                                                               | NA | Identification of biliary structures                                                                             | The identification rate were 90%, 84%, and 48% for the CD, C/D, and C/D.                                                                                                                                                                                                                                                  | NA   | None | NA | NA | Bleszyński MS, DeCicco KM, Moneghetti AT, Chia CJ, Farnon ON. Surg Innov. 2020 Feb;7(1):18-21.                                                                                                                                                                          |
| 65 | Datta      | Germany                                                       | Surg Endosc         | 2020 | Case series                          | Single-incision laparoscopic cholecystectomy using Symphonix | 9 (+3 cases without FC) | ICG | 5mg                                                 | IV                                    | 3h before surgery                                                                   | 1588 system (Styker)                                                             | NA | Feasibility                                                                                                      | NA                                                                                                                                                                                                                                                                                                                        | NA   | None | NA | NA | FC was used to assure safety of LC. M, Gehner F, Schilfmann L, with a new surgical Sigmoid DR, Braun CD, Pauda device. Int J Surg Endosc. 2020 Jun;14(6):979-979.                                                                                                       |
| 66 | Pece       | Italy                                                         | Surg Endosc         | 2020 | Retrospective                        | Lap-cholecystectomy                                          | 26                      | ICG | 0.5mg/kg                                            | IV                                    | 30-45 min prior to surgery                                                          | D-light P light-source unit (Karl Storz)                                         | NA | Effectiveness of FC in the detection of C/D-C/D anatomy intra-operatively in comparison with pre-operative MRCP. | 86.9% accuracy for the visualization of C/D. The level of mucosa, stone, and wall implantation of cystic duct were achieved by FC with diagnostic accuracy values of 62.2%, 78.3%, and 91.3%. C/D (88% before dissection)/97% after dissection), C/D (95%/98%), C/D (-), and C/D-C/D junction (70%/87%).                  | NA   | None | NA | NA | Pece A, La Greca G, Esposito Umberto L, Basile A, Puleo S, Palmucci S. Surg Endosc. 2020 Jun;34(6):2715-2721.                                                                                                                                                           |
| 67 | Agnas      | Italy, France, The Netherlands, Spain, Lithuania, Switzerland | Surg Endosc         | 2020 | Retrospective (registry, 12 centers) | Lap- and robotic cholecystectomy                             | 314                     | ICG | 0.3 mg/kg (median, ranging from 0.02 to 0.62 mg/kg) | IV (gallbladder injection in 2 cases) | 57 min (median, ranging from 1 min to more than 2 days (12h) min before observation | D-light P (Karl Storz) Fxely (Surgical Institute), SP1 (Styker), Papout (Novada) | NA | Visualization of the extrahepatic biliary tract, operative outcomes                                              | At multivariate analysis, pathology and timing remained significant factors affecting the visualization scores of all three structures, whereas ICG dose remained correlated with HD visualization only. C/D (95% before dissection)/95% after dissection), C/D (90%/98%), C/D (90%/98%), and C/D-C/D junction (80%/98%). | NA   | None | NA | NA | Agnas V, Pece A, Bion L, Van Der Bos J, Morikis-Conele S, Pagani AM, Quaresima S, Balla A, La Greca G, Pauda H, Moreno G, Castagnoli M, Santini C, Casali L, Teramelli L, Sassi A, Picchetto A, Arzooz A, Maronecari J, Diaco M. Surg Endosc. 2020 Sep;34(9):3888-3896. |
| 68 | Quaresima  | Italy                                                         | Surg Endosc         | 2020 | Prospective                          | Lap-cholecystectomy                                          | 44 (+44 control)        | ICG | 3.5-13.5mg                                          | IV (gallbladder injection in 2 cases) | 10.7h (mean, ranging 2-52h) before surgery                                          | Image 1S D-Light system (Styker)                                                 | NA | Visualization of the extrahepatic biliary tract, operative outcomes                                              | Mean operative time was 86.9 ± 36.9 (30-180) min in FC group and 117.9 ± 43.4 (40-220) min in ICG group (p = 0.0006).                                                                                                                                                                                                     | None | None | NA | NA | Quaresima S, Balla A, Palmieri L, Scijaj A, Fingheri A, Usai P, Pagani AM. Surg Endosc. 2020 May;34(5):1958-1967.                                                                                                                                                       |

NA, Not available or not assessed
